# Supplementary figures and images for: Selective surface-enhanced fluorescence and dye aggregation with layer-by-layer film substrates
Source: Royal Society of Chemistry journal article supplement (doi:10.1039/b618513d), 2007-01-01

## Fluorescence in solution -SRB

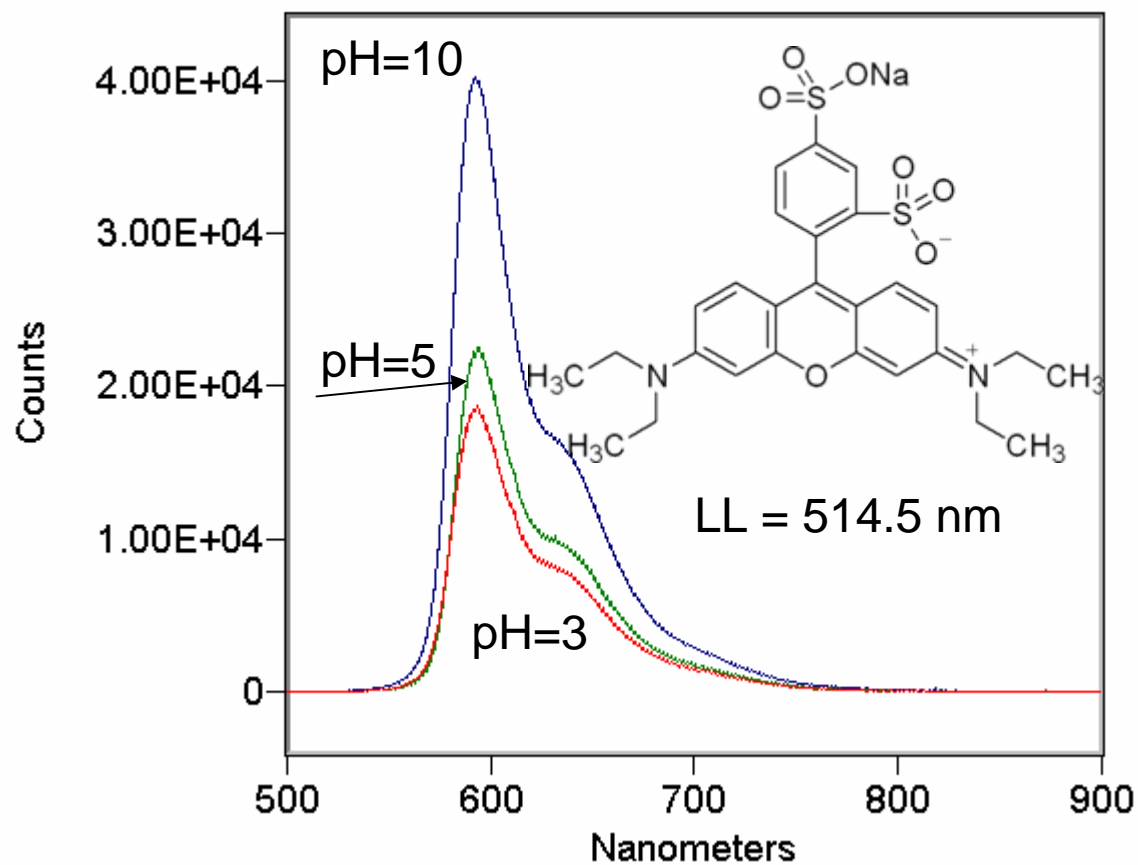

## Fluorescence in solution - Rh123

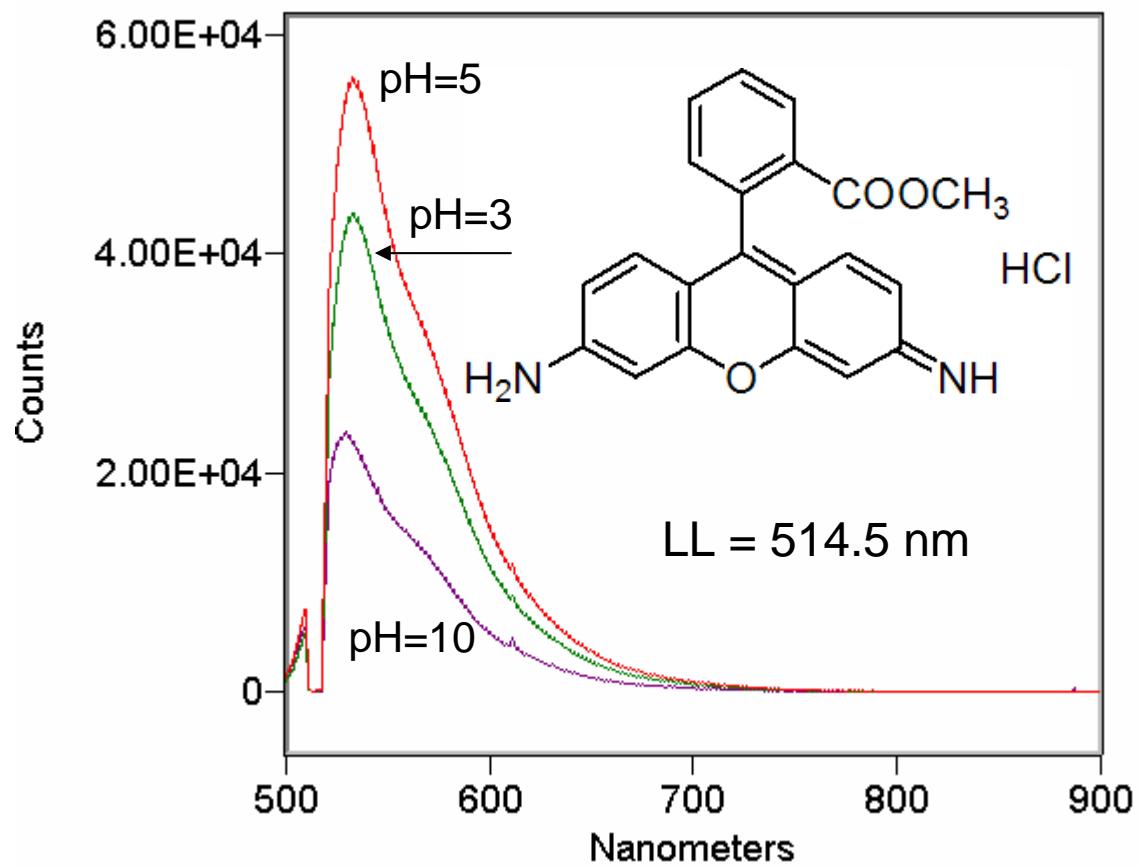

Supplement: suppl.pdf [file suppl.pdf]
